# Supplementary material for: An exploratory MALDI-TOF MS library based on SARAMIS superspectra for rapid identification of Aspergillus section Nigri
Source: PubMed Central journal article supplement — Mycoscience. 2021 Jul 20;62(4):224–32. doi: 10.47371/mycosci.2021.03.004 (PMC9721511; doi:10.47371/mycosci.2021.03.004), 2021-07-20
Supplement: MYC-62-224-s01.pdf [file MYC-62-224-s01.pdf]

Supplementary Table 1

Details of strains of *Aspergillus* sect. *Nigri* used in this study.

| Species name at deposition              | Strain <sup>a</sup>                            | Source                                    | Locality            | GenBank/DDBJ Accession No. |            |           | Clade <sup>b</sup> |
|-----------------------------------------|------------------------------------------------|-------------------------------------------|---------------------|----------------------------|------------|-----------|--------------------|
|                                         |                                                |                                           |                     | ITS                        | calmodulin | β-tubulin |                    |
| <i>Aspergillus aculeatus</i>            | NBRC 5330<br>(ex-type of <i>A. yezoensis</i> ) | butter                                    | Japan               | LC573561                   | LC573676   | -         | VI                 |
| “ <i>A. awamori</i> ”                   | NBRC 31348                                     | cultivated soil                           | Japan               | LC573562                   | LC573677   | LC573620  | VII                |
|                                         | NBRC 4115                                      | unknown                                   | unknown<br>(Japan?) | LC573563                   | LC573678   | LC573621  | I-1                |
|                                         | NBRC 4119                                      | unknown                                   | unknown<br>(Japan?) | LC573564                   | LC573679   | LC573622  | I-1                |
|                                         | NBRC 4120                                      | unknown                                   | unknown<br>(Japan?) | LC573565                   | LC573680   | LC573623  | I-1                |
|                                         | NBRC 4125                                      | unknown                                   | unknown<br>(Japan?) | LC573566                   | LC573681   | LC573624  | I-1                |
|                                         | NBRC 4388<br>(ex-type of <i>A. usamii</i> )    | kuro-koji                                 | unknown<br>(Japan?) | LC573567                   | LC573682   | LC573625  | I-1                |
|                                         | NBRC 4397                                      | unknown                                   | unknown<br>(Japan?) | LC573568                   | LC573683   | LC573626  | I-1                |
|                                         | NBRC 6082                                      | unknown                                   | unknown<br>(Japan?) | LC573569                   | LC573684   | LC573627  | I-1                |
|                                         | NBRC 8875                                      | core samples from stratigraphic drillings | Japan               | LC573570                   | LC573685   | LC573628  | I-1                |
|                                         | NBRC 8876                                      | core samples from stratigraphic drillings | Japan               | LC573571                   | LC573686   | LC573629  | I-1                |
|                                         | NBRC 8877                                      | core samples from stratigraphic drillings | Japan               | LC573572                   | LC573687   | LC573630  | I-1                |
| <i>A. awamori</i> var. <i>fumeus</i>    | NBRC 109442                                    | unknown                                   | Japan               | LC573573                   | LC573688   | -         | I-1                |
| <i>A. brasiliensis</i>                  | NBRC 6341                                      | unknown                                   | unknown             | LC573574                   | LC573689   | LC573631  | II                 |
|                                         | NBRC 9455                                      | blueberry, <i>Vaccinium</i> sp.           | USA                 | LC573575                   | LC573690   | LC573632  | II                 |
|                                         | NBRC 105650                                    | wireless radio equipment                  | Australia           | LC573576                   | LC573691   | LC573633  | II                 |
| <i>A. carbonarius</i>                   | NBRC 4030                                      | unknown                                   | unknown             | LC573577                   | LC573692   | LC573634  | VI                 |
|                                         | NBRC 4038                                      | unknown                                   | unknown<br>(Japan?) | LC573578                   | LC573693   | LC573635  | V                  |
| <i>A. ficuum</i>                        | NBRC 4039                                      | unknown                                   | unknown             | LC573579                   | LC573694   | LC573636  | V                  |
|                                         | NBRC 5864                                      | unknown                                   | unknown             | LC573580                   | LC573695   | LC573637  | V                  |
|                                         | NBRC 4034                                      | unknown                                   | unknown             | LC573581                   | LC573696   | LC573638  | I-1                |
| <i>A. foetidus</i>                      | NBRC 4318                                      | unknown                                   | unknown             | LC573582                   | LC573697   | LC573639  | I-1                |
|                                         | NBRC 4320                                      | unknown                                   | unknown             | LC573583                   | LC573698   | LC573640  | I-1                |
|                                         | NBRC 4031 <sup>NT</sup>                        | awamori-koji                              | unknown<br>(Japan?) | LC573584                   | LC573699   | LC573641  | I-1                |
| <i>A. foetidus</i> var. <i>acidus</i>   | NBRC 4122                                      | unknown                                   | unknown             | LC573585                   | LC573700   | LC573642  | I-1                |
|                                         | NBRC 4312                                      | unknown                                   | unknown             | LC573586                   | LC573701   | LC573643  | I-1                |
|                                         | NBRC 4338                                      | unknown                                   | unknown             | LC573587                   | LC573702   | LC573644  | III                |
|                                         | NBRC 4121                                      | unknown                                   | unknown<br>(Japan?) | LC573588                   | LC573703   | LC573645  | III                |
|                                         | NBRC 4118                                      | unknown                                   | unknown<br>(Japan?) | LC573589                   | LC573704   | LC573646  | III                |
| <i>A. foetidus</i> var. <i>pallidus</i> | NBRC 4123                                      | unknown                                   | unknown<br>(Japan?) | LC573590                   | LC573705   | LC573647  | III                |
| <i>A. japonicus</i>                     | NBRC 4060                                      | unknown                                   | unknown<br>(Japan?) | LC573591                   | LC573706   | LC573648  | VI                 |
|                                         | NBRC 4337                                      | unknown                                   | unknown<br>(Japan?) | LC573592                   | LC573707   | LC573649  | VI                 |

|                                                               |                                                                                       |                                                       |                     |          |          |          |      |
|---------------------------------------------------------------|---------------------------------------------------------------------------------------|-------------------------------------------------------|---------------------|----------|----------|----------|------|
|                                                               | NBRC 4408                                                                             | soil                                                  | unknown<br>(Japan?) | LC573593 | LC573708 | LC573650 | VI   |
|                                                               | NBRC 32856                                                                            | living leaf of<br><i>Phragmites karka</i>             | Japan               | LC573594 | LC573709 | LC573651 | VI   |
| <i>A. kawachii</i>                                            | NBRC 4308                                                                             | unknown                                               | unknown<br>(Japan?) | LC573595 | LC573710 | LC573652 | III  |
| <i>A. luchuensis</i>                                          | NBRC 4033                                                                             | awamori-koji                                          | Japan               | LC573596 | LC573711 | LC573653 | III  |
|                                                               | NBRC 4281 <sup>T</sup>                                                                | awamori-koji                                          | Japan               | LC573597 | LC573712 | JX500062 | III  |
|                                                               | NBRC 4314                                                                             | unknown                                               | unknown<br>(Japan?) | LC573598 | LC573713 | LC573654 | III  |
|                                                               | NBRC 6086                                                                             | tane-koji                                             | unknown<br>(Japan?) | LC573599 | LC573714 | LC573655 | III  |
| <i>A. neoniger</i>                                            | NBRC 111188                                                                           | awamori-koji                                          | Japan               | LC573600 | LC573715 | LC573656 | III  |
|                                                               | NBRC 4068                                                                             | tobacco                                               | unknown<br>(Japan?) | LC573601 | LC573716 | LC573657 | IV-1 |
|                                                               | NBRC 8872                                                                             | core samples from<br>stratigraphic drillings          | Japan               | LC573602 | LC573717 | LC573658 | IV-1 |
|                                                               | NBRC 8873                                                                             | core samples from<br>stratigraphic drillings          | Japan               | LC573603 | LC573718 | LC573659 | IV-1 |
|                                                               | NBRC 113385 <sup>T</sup><br>(= NRRL 62634 <sup>T</sup> ,<br>CBS 115656 <sup>T</sup> ) | sulphur sponge in<br>mangrove, <i>Verongia</i><br>sp. | Venezuela           | KC796401 | KC796377 | KC796361 | IV-1 |
| <i>A. niger</i>                                               | NBRC 6428<br>(= NRRL 337,<br>ex-type of <i>A.</i><br><i>citrus</i> )                  | unknown                                               | German              | LC573604 | LC573719 | LC573660 | I-1  |
|                                                               | NBRC 6661<br>(= NRRL 330)                                                             | plant galls                                           | China               | LC573605 | LC573720 | LC573661 | I-1  |
|                                                               | NBRC 31012                                                                            | crown of <i>Arachis</i><br><i>hypogaea</i>            | Japan               | LC573606 | LC573721 | LC573662 | I-2  |
|                                                               | NBRC 31638                                                                            | decayed leaf of<br><i>Eucalyptus</i> sp.              | Pakistan            | LC573607 | LC573722 | LC573663 | I-2  |
|                                                               | NBRC 33023 <sup>NT</sup><br>(= CBS 554.65 <sup>NT</sup> )                             | tannin-gallic acid<br>fermentation                    | USA                 | LC573608 | LC573723 | LC573664 | I-1  |
|                                                               | NBRC 105649<br>(= NRRL 334)                                                           | leather                                               | unknown             | LC573609 | LC573724 | LC573665 | I-1  |
| <i>A. niger</i> var.<br><i>niger</i> f.<br><i>hennebergii</i> | NBRC 4043<br>(ex-type of <i>A.</i><br><i>cinamomeus</i> )                             | unknown                                               | unknown             | LC573610 | LC573725 | LC573666 | I-2  |
| <i>A. phoenicis</i>                                           | NBRC 6648                                                                             | unknown                                               | unknown             | LC573611 | LC573726 | LC573667 | I-1  |
|                                                               | NBRC 6649                                                                             | whole shelled corn                                    | unknown             | LC573612 | LC573727 | LC573668 | I-2  |
|                                                               | NBRC 6650                                                                             | whole shelled corn                                    | unknown             | LC573613 | LC573728 | LC573669 | I-2  |
|                                                               | NBRC 8874                                                                             | core samples from<br>stratigraphic drillings          | Japan               | LC573614 | LC573729 | LC573670 | I-1  |
| <i>A. turingensis</i>                                         | NBRC 4050                                                                             | unknown                                               | unknown             | LC573615 | LC573730 | LC573671 | IV-2 |
|                                                               | NBRC 4280                                                                             | unknown                                               | unknown             | LC573616 | LC573731 | LC573672 | IV-2 |
|                                                               | NBRC 4407                                                                             | soil                                                  | unknown             | LC573617 | LC573732 | LC573673 | IV-2 |
|                                                               | NBRC 113384 <sup>T</sup><br>(=NRRL 4875 <sup>T</sup> )                                | unknown                                               | unknown             | EF661193 | EF661151 | EF661086 | IV-2 |
|                                                               | NBRC 7523                                                                             | unknown                                               | unknown             | LC573618 | LC573733 | LC573674 | IV-2 |
|                                                               | NBRC 31125                                                                            | soil in organic layer                                 | unknown             | LC573619 | LC573734 | LC573675 | IV-2 |

<sup>a</sup> Abbreviations. CBS: Westerdijk Fungal Biodiversity Institute, Netherlands. NBRC: Biological Resource Center, the National Institute of Technology and Evaluation, Japan. NRRL: Agricultural Research Service Culture Collection, National Center for Agricultural Utilization Research, USA. The superscripts <sup>T</sup> and <sup>NT</sup> indicate an ex-type and ex-neotype strains, respectively.

<sup>b</sup> Phylogenetic clade by calmodulin gene.
