# Supplementary material for: An exploratory MALDI-TOF MS library based on SARAMIS superspectra for rapid identification of Aspergillus section Nigri
Source: PubMed Central journal article supplement — Mycoscience. 2021 Jul 20;62(4):224–32. doi: 10.47371/mycosci.2021.03.004 (PMC9721511; doi:10.47371/mycosci.2021.03.004), 2021-07-20
Supplement: MYC-62-224-s02.pdf [file MYC-62-224-s02.pdf]

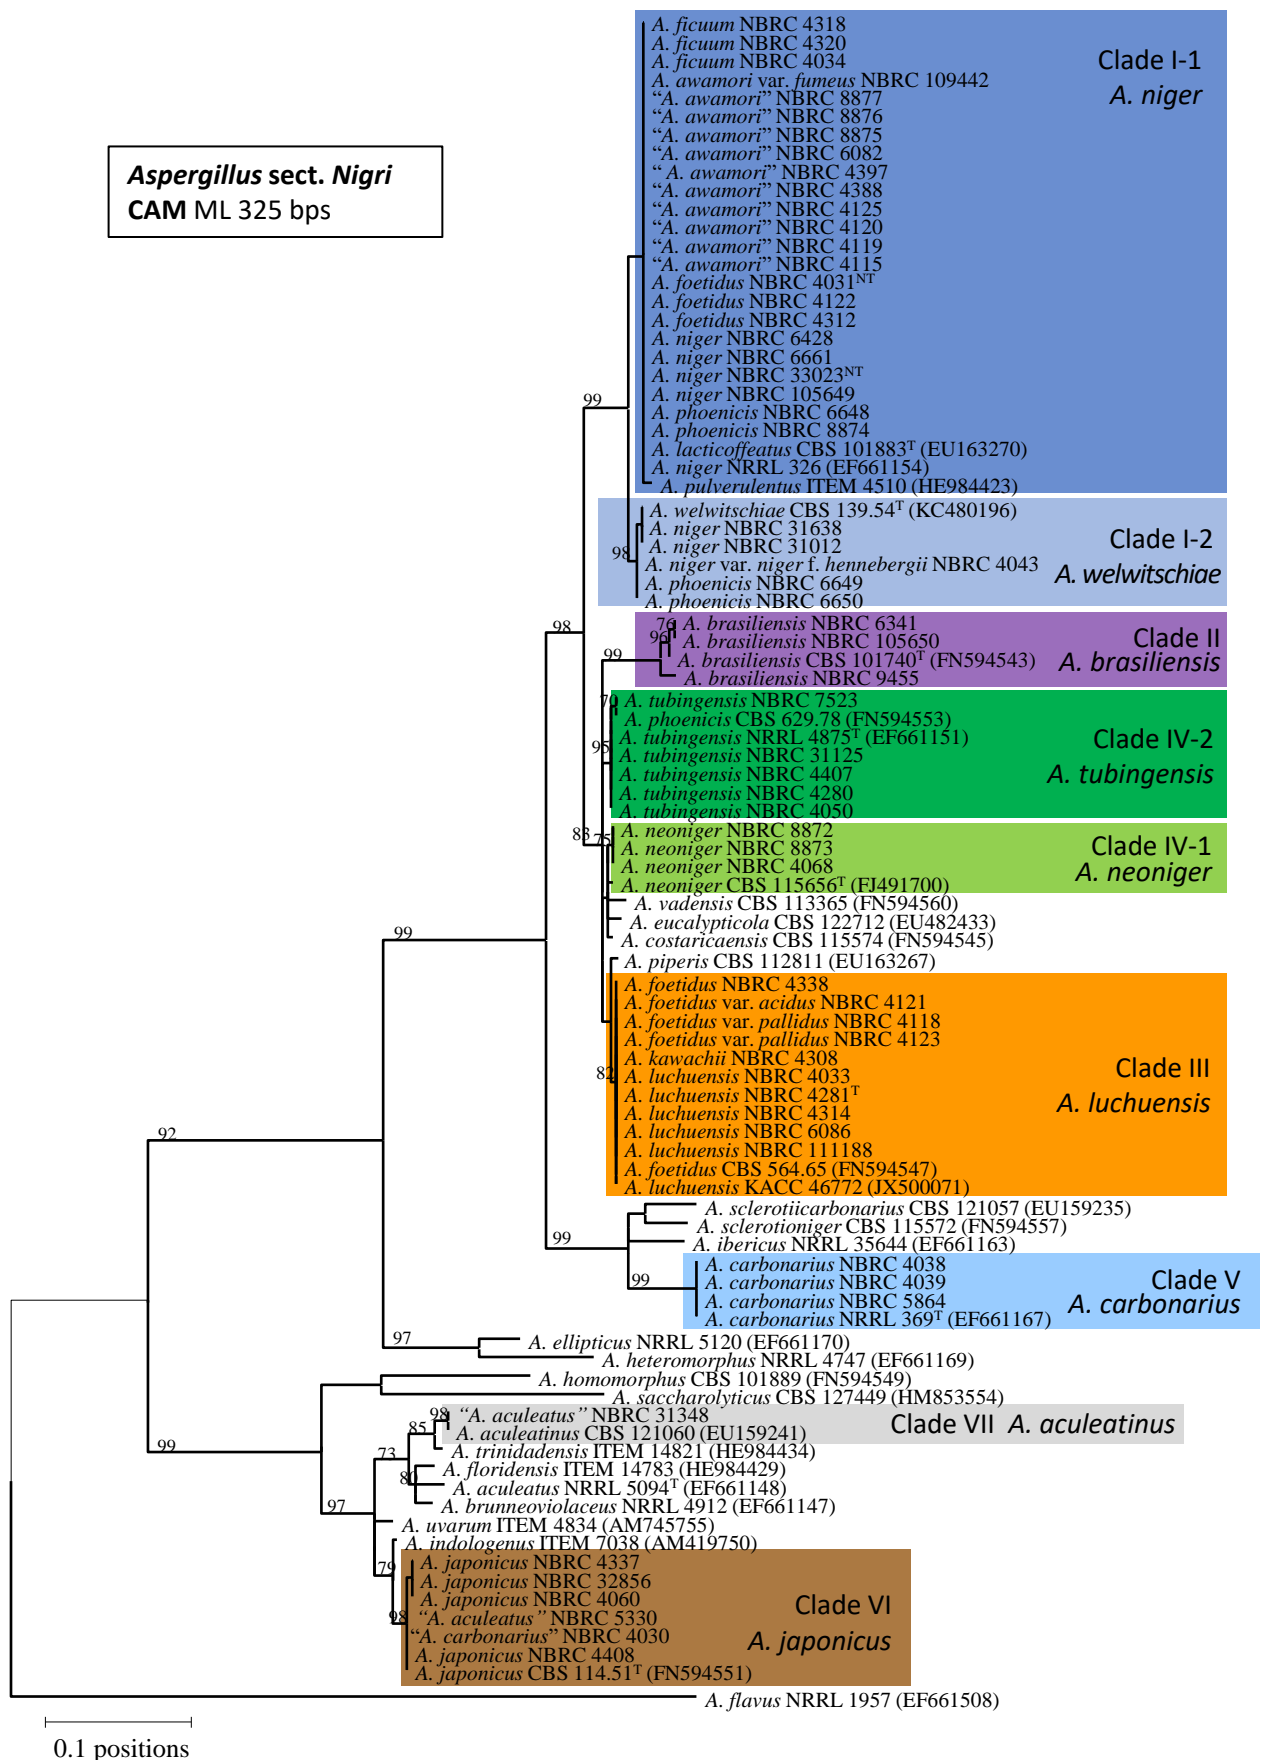

**Supplementary Fig. S1.** A phylogenetic tree of 61 strains used in this study and the related strains of *Aspergillus* sect. *Nigri* by maximum likelihood method based on sequences of calmodulin gene, with algorithm of the General Time Reversible plus discrete Gamma distribution with five rate categories, and by assuming that a certain fraction of sites was evolutionarily invariable (GTR+G+I), which was calculated as the highest likelihood for this dataset. The numbers on the branch nodes represent bootstrap values >70% based on 1000 replications are shown. *Aspergillus flavus* NRRL 1957 was used for an outgroup.
