# Supplementary material for: An exploratory MALDI-TOF MS library based on SARAMIS superspectra for rapid identification of Aspergillus section Nigri
Source: PubMed Central journal article supplement — Mycoscience. 2021 Jul 20;62(4):224–32. doi: 10.47371/mycosci.2021.03.004 (PMC9721511; doi:10.47371/mycosci.2021.03.004), 2021-07-20
Supplement: MYC-62-224-s03.pdf [file MYC-62-224-s03.pdf]

Supplementary Table S2

Molecular weight ( $m/z$ ) of the chosen peaks in the final superspectra. The numbers in the lower row are total consensus peaks respectively.

| <i>Aspergillus niger</i> /<br><i>A. welwitschiae</i> | <i>A. brasiliensis</i> | <i>A. brasiliensis</i><br>NBRC 9455 | <i>A. luchuensis</i> /<br><i>A. kawachii</i> | <i>A. neoniger</i> /<br>(5 days) | <i>A. neoniger</i> 2<br>(5 + 10 days) | <i>A. neoniger</i><br>NBRC 113385 | <i>A. tubingenis</i><br>NBRC 113384 | <i>A. tubingenis</i> 1<br>(5 days) | <i>A. tubingenis</i> 2<br>(5+10 days) | <i>A. neoniger</i> / <i>A.</i><br><i>tubingenis</i> | <i>A. carbonarius</i> 1<br>(5 days) | <i>A. carbonarius</i> 2<br>(5+10 days) | <i>A. japonicus</i><br>NBRC 32856 | <i>A. japonicus</i> |
|------------------------------------------------------|------------------------|-------------------------------------|----------------------------------------------|----------------------------------|---------------------------------------|-----------------------------------|-------------------------------------|------------------------------------|---------------------------------------|-----------------------------------------------------|-------------------------------------|----------------------------------------|-----------------------------------|---------------------|
| 3040.7                                               | 3029.4                 | 3005.2                              | 3007.4                                       | 3051.3                           | 3022.6                                | 3066.6                            | 3006.3                              | 3370.7                             | 3007.1                                | 3007                                                | 3149.4                              | 3049.1                                 | 3005.5                            | 3006.3              |
| 3055.5                                               | 3041.2                 | 3029.2                              | 3022.6                                       | 3079.9                           | 3051.2                                | 3074.4                            | 3022.9                              | 3505.6                             | 3023.3                                | 3023.1                                              | 3394.1                              | 3379.7                                 | 3020.8                            | 3052.3              |
| 3378                                                 | 3112.3                 | 3098.8                              | 3060.7                                       | 3213.4                           | 3080.1                                | 3370.5                            | 3061.2                              | 3620                               | 3061.2                                | 3352.1                                              | 3485.2                              | 3484.8                                 | 3029.6                            | 3064.2              |
| 3475.4                                               | 3125.6                 | 3110.9                              | 3351.6                                       | 3254.6                           | 3213.4                                | 3639.4                            | 3370.8                              | 4069.2                             | 3370.5                                | 3393.3                                              | 3679                                | 3678.1                                 | 3049.7                            | 3075.2              |
| 3505.1                                               | 3240.8                 | 3137.1                              | 3363.9                                       | 3375.5                           | 3352.2                                | 4533.3                            | 3505.3                              | 4525.8                             | 3393.5                                | 3505.5                                              | 3968.5                              | 4038                                   | 3064.1                            | 3332.1              |
| 3572                                                 | 3378.9                 | 3175.1                              | 3505.6                                       | 3505.3                           | 3376                                  | 4614.6                            | 3638.2                              | 4537.1                             | 3505.4                                | 3619.7                                              | 3992                                | 4059.8                                 | 3080.8                            | 3434.8              |
| 3636.7                                               | 3437.8                 | 3213.4                              | 3516.1                                       | 3619.6                           | 3538.8                                | 4669.3                            | 3700.2                              | 4584.1                             | 3619.7                                | 4525.6                                              | 4011.4                              | 4124.8                                 | 3229.4                            | 3682.9              |
| 3734.6                                               | 3455                   | 3227.2                              | 3529.6                                       | 3638.9                           | 3619.2                                | <b>4687.7</b>                     | 3806.1                              | 4616.2                             | 4011.6                                | 4537.1                                              | 4038                                | 4436.8                                 | 3691                              | 3691                |
| 4046.2                                               | 3722.7                 | 3348.4                              | 4049.7                                       | 3708.5                           | 3638.8                                | 4698.4                            | 4011.8                              | <b>4688.1</b>                      | 4049.5                                | 4615.5                                              | 4437.7                              | 4543.1                                 | 3868.7                            | 3841.6              |
| 4129.8                                               | 3851.4                 | 3423.7                              | 4130.9                                       | 3938.5                           | 3699.6                                | 4749.4                            | 4049.2                              | 5004.9                             | 4525.7                                | 4641.2                                              | 4542.9                              | 4613.3                                 | 4031.7                            | 3911.3              |
| 4143.5                                               | 3866.6                 | 3441.8                              | 4467.8                                       | 4293.8                           | 3905.1                                | 4827                              | 4536.8                              | 5127.5                             | 4537.1                                | <b>4688.3</b>                                       | 4613.5                              | 4710.1                                 | 4128.2                            | 4016.7              |
| 4339.3                                               | 3889.6                 | 3480                                | 4535.5                                       | 4467.4                           | 3938.4                                | 4848.4                            | 4546.9                              | 5141.4                             | 4616.1                                | 4962.9                                              | <b>4688.7</b>                       | 5141.8                                 | 4144.8                            | 4127.6              |
| 4367.9                                               | 4012                   | 3570.9                              | 4662.7                                       | 4602.7                           | 4466.8                                | 4864.4                            | <b>4684.7</b>                       | <b>5246.9</b>                      | 4641                                  | 5004.9                                              | 4726.6                              | 5291.1                                 | 4212.6                            | 4200.7              |
| 4495.3                                               | 4030.2                 | 3682.4                              | <b>4688.5</b>                                | 4614.4                           | 4602.4                                | 4936.2                            | 4729.9                              | 5263                               | <b>4688.1</b>                         | 5127.9                                              | 5291                                | 5307.2                                 | 4249.9                            | 4249.8              |
| 4565.9                                               | 4066.3                 | 3711.6                              | 4704.7                                       | 4642.1                           | 4614.3                                | 5012.4                            | 4841.1                              | 5276.9                             | 4728.1                                | 5141.3                                              | 5307.1                              | 5430.8                                 | 4369.1                            | 4505.6              |
| 4670.8                                               | 4177.6                 | 3812.5                              | 5091.1                                       | 4652.4                           | 4642.1                                | 5125.8                            | 4936                                | 5318.2                             | 4962.8                                | <b>5246.9</b>                                       | 5428.3                              | 5772.4                                 | 4467.6                            | 4581.2              |
| <b>4687</b>                                          | 4194.2                 | 3850.9                              | 5105.4                                       | 4981.2                           | 4652.2                                | 5148.3                            | 5128.1                              | 5997.4                             | 5005.1                                | 5462.4                                              | 5616.4                              | 5789.4                                 | 4512.7                            | 4683.9              |
| 4756.7                                               | 4267.3                 | 4155.6                              | 5122.1                                       | 5068.3                           | 4860                                  | <b>5246.9</b>                     | 5215.4                              | <b>6014.4</b>                      | 5141.3                                | 5276.7                                              | 5811.8                              | 5811.2                                 | 4640.5                            | 4795.3              |
| 4995.7                                               | 4406.2                 | 4195.6                              | <b>5246.9</b>                                | <b>5246.7</b>                    | 4966.4                                | 5283.5                            | <b>5246.8</b>                       | 6151.8                             | 5154.5                                | 5317.8                                              | <b>6011.4</b>                       | 5892                                   | 4989.8                            | 5228.2              |
| 5151.7                                               | 4522.9                 | 4398.1                              | 5262.8                                       | 5262.2                           | 4981.5                                | 5318.4                            | 5262.2                              | 6399.2                             | 6399.2                                | 5462.4                                              | 6300.4                              | <b>6010.9</b>                          | 5254.9                            | 5388.5              |
| 5167.9                                               | 4541.4                 | 4508.9                              | 5348.4                                       | 5318                             | 5068                                  | 5334.6                            | 5296.5                              | 6422.8                             | 5262.9                                | 5649.6                                              | 6323                                | 6258.2                                 | 5304.6                            | 5566.9              |
| 5223                                                 | 4550.8                 | 4536.2                              | 5491.5                                       | 5334.3                           | 5130                                  | 5462.6                            | 5318.5                              | 6459.6                             | 5276.7                                | 5685.2                                              | 6422.6                              | 6299.9                                 | 5321.4                            | 5684                |
| 5239.3                                               | 4679.9                 | 4548.9                              | 5997.9                                       | 5348.3                           | <b>5246.7</b>                         | <b>6011.5</b>                     | 5463                                | 6687.6                             | 5318.1                                | 5996.5                                              | 6423                                | 6423                                   | 5496.2                            | 5890.6              |
| 5309.2                                               | <b>4687.5</b>          | 4665.3                              | <b>6015</b>                                  | 5505.6                           | 5262.3                                | 6134.1                            | 5978.9                              | 6743.3                             | 5462.5                                | <b>6012.5</b>                                       | 6575.1                              | 6550.3                                 | 5564.6                            | 5912.5              |
| 5501.5                                               | 4698.2                 | <b>4689</b>                         | 6047.6                                       | 5649.7                           | 5317.9                                | 6150.9                            | 5995.5                              | <b>7032.6</b>                      | 5685.1                                | 6150.5                                              | 6596.7                              | 6561.9                                 | 5739.8                            | 5941                |
| 5668.9                                               | 4777.1                 | 4762.4                              | 6123.7                                       | 6039.6                           | 5334                                  | 6932                              | <b>6013</b>                         | 7256.4                             | 5939.8                                | 6423.6                                              | 6651                                | 6575.6                                 | 5955.4                            | 5991.5              |
| 5901.6                                               | 5122.5                 | 4780.5                              | 6406.3                                       | 6070.4                           | 5504.7                                | <b>7032.4</b>                     | 6149.8                              | 7306.4                             | 5996.3                                | 6459.7                                              | 6678.9                              | 6597.1                                 | 5992.3                            | <b>6014.8</b>       |
| 5923                                                 | <b>5244</b>            | 4852                                | 6442.9                                       | 6133.7                           | 5584.3                                | 7256.5                            | 6459.2                              | 7613.8                             | <b>6013.8</b>                         | 6742                                                | 6790.3                              | 6651.2                                 | <b>6015</b>                       | 6151.7              |
| 6086.7                                               | 5454.1                 | 4876.6                              | 6521.2                                       | 6303.8                           | 5650.1                                | 9066.9                            | 6569.5                              | 8100.5                             | 6150.7                                | <b>7031.9</b>                                       | 6822.5                              | 6679                                   | 6182.9                            | 6181.6              |
| 6111                                                 | 5607.4                 | 5088.8                              | 6554                                         | 6409.5                           | 5684.8                                | 9340.1                            | 6743.2                              | 8139.7                             | 6459.6                                | 7256                                                | 6923.5                              | 6762                                   | 6240.8                            | 6531.6              |
| 6125.3                                               | 5785.4                 | 5105.9                              | 6697.5                                       | 6440.8                           | 5996.5                                | 9655.7                            | <b>7032</b>                         | 9052.6                             | 6743                                  | 7613.4                                              | 6952.3                              | 6790.2                                 | 6278.2                            | 6573.4              |
| 6175.9                                               | 5940.4                 | <b>5244.6</b>                       | 6729.1                                       | 6478.2                           | 6038.6                                | 10025.1                           | 7455                                | 9325.9                             | 6743                                  | <b>7032.2</b>                                       | 8280.7                              | <b>7032.9</b>                          | 6823                              | 6666.5              |
| 6281                                                 | 6122.5                 | 5431.1                              | <b>7032.9</b>                                | 6514                             | 6133.8                                | 10297                             | 7613.5                              | 9458.5                             | 7256.2                                | 9051.9                                              | 7198.7                              | 6923.6                                 | 6479.4                            | 6836                |
| 6418.5                                               | 6283                   | 5446.8                              | 7207.1                                       | 6755.4                           | 6410.1                                | 10423.4                           | 8025.4                              | 9641.6                             | 7306.2                                | 9325.2                                              | 7474.2                              | 6952.7                                 | 6607.6                            | 7027.7              |
| 6667                                                 | 6318.1                 | 5607.4                              | 7276.5                                       | 6782.9                           | 6440.9                                | 10567.8                           | 8099.6                              | 10010.6                            | 7613.4                                | 9641                                                | 7659.9                              | 7198.6                                 | 6936                              | 7198.2              |
| <b>7033.7</b>                                        | 6553.2                 | 6123.5                              | 7452.3                                       | <b>7032.2</b>                    | 6783.4                                | 10926.5                           | 8138                                | 10283.1                            | 8100                                  | 10009.7                                             | 7986.3                              | 7213.2                                 | 7028.5                            | 7368.5              |
| 7101.8                                               | 6760.1                 | 6296.5                              | 7613.8                                       | 7255.1                           | <b>7032.1</b>                         |                                   | 9092.6                              | 10553.3                            | 8139                                  | 10282.2                                             | 8078.3                              | 7443.4                                 | 7202.5                            | 7623.6              |
| 7145.7                                               | <b>7033.1</b>          | 6332.5                              | 8025.9                                       | 7334.5                           | 7255.1                                |                                   | 9365.7                              | 10926.5                            | 9052.3                                | 10553.1                                             | 8122.2                              | 8078.5                                 | 7886.5                            | 7667.3              |
| 7182.6                                               | 7402.7                 | 6582.8                              | 8100.2                                       | 7420                             | 7333.5                                |                                   | 10593.1                             |                                    | 9325.6                                | 10926                                               | 8251.4                              | 8024.9                                 | 8024.9                            | 7691.6              |
| 7277.2                                               | 7434.1                 | 6760.5                              | 8936.5                                       | 7474.6                           | 7419.9                                |                                   |                                     |                                    | 9458.6                                |                                                     | 8876.1                              | 8251.8                                 | 8086.2                            | 7824                |
| 7471.6                                               | 7641.3                 | 7641.6                              | 9071.3                                       | 7615.3                           | 7879.7                                |                                   |                                     |                                    | 9641.4                                |                                                     |                                     | 8267.7                                 | 8435.2                            | 8028.9              |
| 7607.7                                               | 7873.6                 | 8030.2                              | 9411.2                                       | 7879.9                           | 8280.9                                |                                   |                                     |                                    | 10010.2                               |                                                     |                                     | 11780.8                                | 8503                              | 8501.8              |
| 7622.6                                               | 8029.7                 | 8062.5                              |                                              | 8281.2                           | 9324                                  |                                   |                                     |                                    | 10282.6                               |                                                     |                                     | 14399.7                                | 10612.4                           | 9165.3              |
| 8095.1                                               | 8062.2                 | 8797                                |                                              | 8937                             | 9442.6                                |                                   |                                     |                                    | 10553.5                               |                                                     |                                     |                                        |                                   |                     |
| 8289                                                 | 8813                   | 8868.3                              |                                              |                                  |                                       |                                   |                                     |                                    | 10926.6                               |                                                     |                                     |                                        |                                   |                     |
|                                                      | 9086.2                 | 9071.7                              |                                              |                                  |                                       |                                   |                                     |                                    |                                       |                                                     |                                     |                                        |                                   |                     |
|                                                      | 9882.2                 | 10862.3                             |                                              |                                  |                                       |                                   |                                     |                                    |                                       |                                                     |                                     |                                        |                                   |                     |
|                                                      | 10909.3                |                                     |                                              |                                  |                                       |                                   |                                     |                                    |                                       |                                                     |                                     |                                        |                                   |                     |
| 45                                                   | 48                     | 47                                  | 42                                           | 44                               | 44                                    | 36                                | 39                                  | 38                                 | 45                                    | 39                                                  | 40                                  | 43                                     | 44                                | 42                  |

Masses frequently present in the superspectra are highlighted in bold.
