# Supplementary material for: An exploratory MALDI-TOF MS library based on SARAMIS superspectra for rapid identification of Aspergillus section Nigri
Source: PubMed Central journal article supplement — Mycoscience. 2021 Jul 20;62(4):224–32. doi: 10.47371/mycosci.2021.03.004 (PMC9721511; doi:10.47371/mycosci.2021.03.004), 2021-07-20
Supplement: MYC-62-224-s04.pdf [file MYC-62-224-s04.pdf]

Supplementary Table S3

Identification outputs using the expanded SARAMIS library (supplier's plus newly created in this study).

The column of 'priority identified name' is colored to make easy-to-see the resulting situation as same with displayed by SARAMIS; green (above 99.9% in confidence level), yellow-green (99.8 to 90.0 %), yellow (89.9 to 80.0 %), pale blue (79.9 to 75.0 %), pale red (several candidate species were returned above 80%), and colorless (nothing returned above 75.0%).

In the 'confidence level' column, abbreviations of superspectra name (epithet or strain number) which was returned in each level are shown. ng: *niger*, br: *brasiliensis*, lk: *luchuensis* and *kawachii*, neo: *neoniger*, tub: *tubingensis*, ca: *carbonarius*, jp: *japonicus*, 5d: 5 d culture, 10d: 10 d, all: accumulate data from 5 d + 10 d. Black letters mean the superspectra made and already installed by the supplier, colored letters mean superspectra newly created in this study. Bold and red letters emphasize that discordant answer was returned.

| Clade by<br><i>calmodulin</i>           | Species Name<br>at deposition | Strain No.<br>of query                   | Incubation<br>period,<br>data # | Datacount<br>of query | Priority Identified name                         | Confidence Level                       |                                            |                   |
|-----------------------------------------|-------------------------------|------------------------------------------|---------------------------------|-----------------------|--------------------------------------------------|----------------------------------------|--------------------------------------------|-------------------|
|                                         |                               |                                          |                                 |                       |                                                  | 99.9 ~ 90.0 %                          | 89.9 ~ 80.0 %                              | 79.9 ~ 70.0 %     |
|                                         | <i>Aspergillus niger</i>      | NBRC 105649                              | 5day_#1                         | 117                   | <i>A. niger</i>                                  | ng_all, ng_5d                          | ng_10d, ng5                                | ng10              |
|                                         |                               |                                          | 5day_#2                         | 113                   | <i>A. niger</i>                                  | ng_all, ng5d                           | ng_10d, ng14, ng5                          | ng7, ng11         |
|                                         |                               |                                          | 10day_#1                        | 119                   | <i>A. niger</i>                                  | ng_all, ng_10d                         | ng_5d                                      |                   |
|                                         |                               |                                          | 10day_#2                        | 141                   | <i>A. niger</i>                                  | ng_5d, ng_10d, ng_all                  | ng5                                        |                   |
|                                         | <i>A. niger</i>               | NBRC 33023 <sup>T</sup>                  | 5day_#1                         | 145                   | <i>A. niger</i>                                  | ng_5d, ng_10d, ng_all, ng14, ng7, ng5  | ng13, ng11, ng8, ng12, ng10                | ng9, ng6, ng0     |
|                                         |                               |                                          | 5day_#2                         | 134                   | <i>A. niger</i>                                  | ng_5d, ng_all, ng14, ng5               | ng7, ng11, ng13, ng12, ng8                 | ng10, ng6, ng9    |
|                                         |                               |                                          | 10day_#1                        | 134                   | <i>A. niger</i>                                  | ng_5d, ng_10d, ng_all                  | ng5                                        | ng7               |
|                                         |                               |                                          | 10day_#2                        | 97                    | <i>A. niger</i>                                  | ng_5d, ng_all, ng5                     | ng_10d, ng7                                | ng9, ng6          |
|                                         | <i>A. niger</i>               | NBRC 6661                                | 5day_#1                         | 84                    | <i>A. niger</i>                                  | ng_all, ng_5d, ng5                     | ng_10d, ng7                                |                   |
|                                         |                               |                                          | 5day_#2                         | 132                   | <i>A. niger</i>                                  | ng_5d, ng_10d, ng_all, ng5, ng7        |                                            | ng16, ng3, ng6    |
|                                         |                               |                                          | 10day_#1                        | 153                   | <i>A. niger</i>                                  | ng_5d, ng_10d, ng_all, ng5             | ng7                                        | ng0, ng3          |
|                                         |                               |                                          | 10day_#2                        | 121                   | <i>A. niger</i>                                  | ng_5d, ng_10d, ng_all, ng5             |                                            |                   |
|                                         | " <i>A. awamori</i> "         | NBRC 8875                                | 5day_#1                         | 127                   | <i>A. niger</i>                                  | ng_5d, ng_10d, ng_all                  | ng5                                        | ng7               |
|                                         |                               |                                          | 5day_#2                         | 134                   | <i>A. niger</i>                                  | ng_5d, ng_10d, ng_all, ng5             | ng7                                        |                   |
|                                         |                               |                                          | 10day_#1                        | 131                   | <i>A. niger</i>                                  | ng_5d, ng_10d, ng_all                  | ng5                                        |                   |
|                                         |                               |                                          | 10day_#2                        | 156                   | <i>A. niger</i>                                  | ng_5d, ng_10d, ng_all, ng5, ng7        |                                            | ng12, ng13, ng14  |
|                                         | <i>A. ficuum</i>              | NBRC 4034                                | 5day_#1                         | 147                   | <i>A. niger</i>                                  | ng_5d, ng_10d, ng_all, ng5             | ng7, ng0                                   | ng14, ng9         |
|                                         |                               |                                          | 5day_#2                         | 120                   | <i>A. niger</i>                                  | ng_5d, ng_10d, ng_all                  |                                            |                   |
|                                         |                               |                                          | 10day_#1                        | 159                   | <i>A. niger</i>                                  | ng_10d                                 | ng_all                                     |                   |
|                                         |                               |                                          | 10day_#2                        | 111                   | <i>A. niger</i>                                  |                                        |                                            | ng_10d            |
|                                         | <i>A. ficuum</i>              | NBRC 4320                                | 5day_#1                         | 116                   | <i>A. niger</i>                                  | ng_5d, ng_10d, ng_all                  |                                            | ng5               |
|                                         |                               |                                          | 5day_#2                         | 132                   | <i>A. niger</i>                                  | ng_5d, ng_10d, ng_all                  | ng5                                        |                   |
|                                         |                               |                                          | 10day_#1                        | 101                   | <i>A. niger</i>                                  |                                        | ng_10d                                     | ng_all            |
|                                         |                               |                                          | 10day_#2                        | 158                   | <i>A. niger</i>                                  | ng_5d, ng_10d, ng_all                  |                                            |                   |
|                                         | " <i>A. awamori</i> "         | NBRC 4388                                | 5day_#1                         | 105                   | <i>A. niger</i>                                  | ng_5d, ng_10d, ng_all                  |                                            |                   |
|                                         |                               |                                          | 5day_#2                         | 152                   | <i>A. niger</i>                                  | ng_5d, ng_10d, ng_all, ng5             |                                            | ng7               |
|                                         |                               |                                          | 10day_#1                        | 174                   | <i>A. niger</i>                                  | ng_5d, ng_10d, ng_all, ng5             |                                            |                   |
|                                         |                               |                                          | 10day_#2                        | 124                   | <i>A. niger</i>                                  | ng_5d, ng_10d, ng_all, ng14            | ng7, ng5, ng11, ng13                       | ng10, ng12        |
|                                         | " <i>A. awamori</i> "         | NBRC 4397                                | 5day_#1                         | 139                   | <i>A. niger</i>                                  | ng_5d, ng_10d, ng_all                  | ng5                                        |                   |
|                                         |                               |                                          | 5day_#2                         | 112                   | <i>A. niger</i>                                  | ng_5d, ng_10d, ng_all, ng5             |                                            |                   |
|                                         |                               |                                          | 10day_#1                        | 149                   | <i>A. niger</i>                                  | ng_5d, ng_10d, ng_all, ng5             |                                            | ng7               |
|                                         |                               |                                          | 10day_#2                        | 147                   | <i>A. niger</i>                                  | ng_all, ng_10d                         | ng_5d                                      |                   |
|                                         | <i>A. phoenicis</i>           | NBRC 6648                                | 5day_#1                         | 101                   | <i>A. niger</i>                                  | ng_5d, ng_10d, ng_all                  |                                            | ng7, ng5          |
|                                         |                               |                                          | 5day_#2                         | 131                   | <i>A. niger</i>                                  | ng_5d, ng_10d, ng_all                  |                                            |                   |
|                                         |                               |                                          | 10day_#1                        | 116                   | <i>A. niger</i>                                  | ng_all                                 | ng14, ng13, ng_5d, ng11, ng10, ng_10d, ng8 |                   |
|                                         |                               |                                          | 10day_#2                        | 93                    | <i>A. niger</i>                                  | ng_all, ng_5d                          | ng5, ng14                                  | ng_10d, ng11, ng7 |
|                                         | <i>A. phoenicis</i>           | NBRC 6649                                | 5day_#1                         | 128                   | <i>A. niger</i>                                  | ng_5d, ng_10d, ng_all                  |                                            |                   |
|                                         |                               |                                          | 5day_#2                         | 129                   | <i>A. niger</i>                                  | ng_5d, ng_10d, ng_all                  |                                            |                   |
|                                         |                               |                                          | 10day_#1                        | 152                   | <i>A. niger</i>                                  | ng_5d, ng_10d, ng_all, ng5             | ng7                                        | ng3               |
|                                         |                               |                                          | 10day_#2                        | 178                   | <i>A. niger</i>                                  | ng_5d, ng_10d, ng_all                  | ng5                                        |                   |
|                                         | <i>A. phoenicis</i>           | NBRC 6650                                | 5day_#1                         | 154                   | <i>A. niger</i>                                  | ng_5d, ng_10d, ng_all                  |                                            | ng5               |
|                                         |                               |                                          | 5day_#2                         | 154                   | <i>A. niger</i>                                  | ng_5d, ng_10d, ng_all, ng5             |                                            |                   |
|                                         |                               |                                          | 10day_#1                        | 226                   | <i>A. niger</i>                                  | ng_5d, ng_10d, ng_all                  | <i>Yersinia pestis_1</i> , ng5             |                   |
|                                         |                               |                                          | 10day_#2                        | 114                   | <i>A. niger</i>                                  |                                        | ng_10d                                     |                   |
|                                         | <i>A. niger</i>               | NBRC 31012<br>( <i>A. welwitschiae</i> ) | 5day_#1                         | 120                   | <i>A. niger</i>                                  |                                        | ng_5d, ng_all, ng14, ng13                  | ng11, ng12        |
|                                         |                               |                                          | 5day_#2                         | 113                   | <i>A. niger</i>                                  | ng_all, ng5d                           |                                            | ng_10d, ng14      |
|                                         |                               |                                          | 10day_#1                        | 135                   | <i>A. niger</i>                                  | ng_all                                 | ng_10d                                     | ng_5d             |
|                                         |                               |                                          | 10day_#2                        | 160                   | <i>A. niger</i>                                  | ng_all                                 | ng_10d, ng_5d                              |                   |
|                                         | <i>A. niger</i>               | NBRC 31638<br>( <i>A. welwitschiae</i> ) | 5day_#1                         | 122                   | <i>A. niger</i>                                  | ng_5d, ng_all, ng5                     | ng_10d, ng7                                |                   |
|                                         |                               |                                          | 5day_#2                         | 107                   | <i>A. niger</i>                                  | ng_5d, ng_all, ng14, ng5               |                                            |                   |
| 10day_#1                                |                               |                                          | 146                             | <i>A. niger</i>       | ng_5d, ng_10d, ng_all                            |                                        |                                            |                   |
| 10day_#2                                |                               |                                          | 105                             | <i>A. niger</i>       | ng_10d, ng_all                                   |                                        |                                            |                   |
| <i>As awamori</i> var.<br><i>fumeus</i> | NBRC 109442                   | 5day_#1                                  | 115                             | <i>A. niger</i>       | ng14, ng10, ng11                                 | ng13, ng8                              |                                            |                   |
|                                         |                               | 5day_#2                                  | 113                             | <i>A. niger</i>       | ng14, ng13                                       | ng11, ng10, ng12, ng8                  | ng/lac1, sp7                               |                   |
|                                         |                               | 10day_#1                                 | 83                              | <i>A. niger</i>       |                                                  | ng14, ng11                             |                                            |                   |
|                                         |                               | 10day_#2                                 | 97                              | <i>A. niger</i>       |                                                  |                                        | ng14, ng11                                 |                   |
| <i>A. foetidus</i>                      | NBRC 4031                     | 5day_#1                                  | 126                             | <i>A. niger</i>       |                                                  | ng8, ng14, ng12, ng10, ng13, ng11, ng7 |                                            |                   |
|                                         |                               | 5day_#2                                  | 104                             | <i>A. niger</i>       | ng14, ng10                                       | ng8, ng11                              | ng13, ng9, ng_5d                           |                   |
|                                         |                               | 10day_#1                                 | 161                             | <i>A. niger</i>       |                                                  | ng_10d, ng_all                         |                                            |                   |
|                                         |                               | 10day_#2                                 | 151                             | <i>A. niger</i>       | ng_10d                                           | ng_all                                 |                                            |                   |
| <i>A. foetidus</i>                      | NBRC 4122                     | 5day_#1                                  | 131                             | <i>A. niger</i>       | ng_5d, ng_10d, ng_all, ng14                      | ng5, ng11, ng9, ng10, ng7              |                                            |                   |
|                                         |                               | 5day_#2                                  | 153                             | <i>A. niger</i>       | ng_5d, ng_10d, ng_all                            | ng5                                    |                                            |                   |
|                                         |                               | 10day_#1                                 | 166                             | <i>A. niger</i>       | ng_all, ng_10d                                   |                                        | <i>Staphylococcus hominis_14</i> , ng_5d   |                   |
|                                         |                               | 10day_#2                                 | 150                             | <i>A. niger</i>       | ng_all                                           | ng_10d, ng_5d                          |                                            |                   |
| " <i>A. awamori</i> "                   | NBRC 4125                     | 5day_#1                                  | 76                              | <i>A. niger</i>       |                                                  |                                        | ng14                                       |                   |
|                                         |                               | 5day_#2                                  | 94                              | <i>A. niger</i>       |                                                  | ng14, ng11                             |                                            |                   |
|                                         |                               | 10day_#1                                 | 74                              | <i>A. niger</i>       |                                                  |                                        | ng14, ng11                                 |                   |
|                                         |                               | 10day_#2                                 | 112                             | <i>A. niger</i>       |                                                  | ng14, ng11, ng8                        | ng10                                       |                   |
| " <i>A. awamori</i> "                   | NBRC 6082                     | 5day_#1                                  | 95                              | N.I.                  |                                                  |                                        |                                            |                   |
|                                         |                               | 5day_#2                                  | 73                              | N.I.                  |                                                  |                                        |                                            |                   |
|                                         |                               | 10day_#1                                 | 104                             | <i>A. niger</i>       |                                                  | ng14                                   | ng11, ng10                                 |                   |
|                                         |                               | 10day_#2                                 | 97                              | <i>A. niger</i>       | ng14                                             | ng11, ng10, ng13, ng9                  |                                            |                   |
| <i>A. niger</i>                         | NBRC 6428                     | 5day_#1                                  | 140                             | <i>A. niger</i>       | ng14, ng10, ng_all                               | ng11, ng_10d, ng9, ng13, ng_5d         | ng12                                       |                   |
|                                         |                               | 5day_#2                                  | 119                             | <i>A. niger</i>       | ng_all                                           | ng_5d, ng_10d                          | ng14                                       |                   |
|                                         |                               | 10day_#1                                 | 151                             | <i>A. niger</i>       | ng_all                                           | ng_10d                                 | ng_5d                                      |                   |
|                                         |                               | 10day_#2                                 | 114                             | <i>A. niger</i>       |                                                  | ng_all                                 | ng14                                       |                   |
| <i>A. awamori</i>                       | NBRC 8877                     | 5day_#1                                  | 143                             | <i>A. niger</i>       | ng14, ng12, ng10, ng11, ng13, ng7, ng_5d, ng_all |                                        | ng9                                        |                   |
|                                         |                               | 5day_#2                                  | 140                             | <i>A. niger</i>       | ng_5d, ng_10d, ng_all                            |                                        |                                            |                   |

|                                       |                                         |                                     |                        |                                   |                                       |                                            |                                    |                            |
|---------------------------------------|-----------------------------------------|-------------------------------------|------------------------|-----------------------------------|---------------------------------------|--------------------------------------------|------------------------------------|----------------------------|
| I                                     | <i>A. ficuum</i>                        | NBRC 4318                           | 10day_#1               | 102                               | <i>A. niger</i>                       | ng14                                       | ng11, ng10, ng13,                  | ng8, ng12                  |
|                                       |                                         |                                     | 10day_#2               | 118                               | <i>A. niger</i>                       | ng_5d, ng_all, ng_10d, ng14                | ng10, ng7, ng5, ng9, ng11, ng8     | ng13, ng6                  |
|                                       |                                         |                                     | 5day_#1                | 115                               | <i>A. niger</i>                       | ng_5d, ng_10d, ng_all                      | ng5                                | ng7                        |
|                                       | "A. awamori"                            | NBRC 4120                           | 10day_#1               | 126                               | N.I.                                  |                                            |                                    |                            |
|                                       |                                         |                                     | 10day_#2               | 87                                | <i>A. niger</i>                       |                                            | ng_5d                              | ng7, ng_all                |
|                                       |                                         |                                     | 5day_#1                | 107                               | <i>A. niger</i>                       | ng_5d, ng_all, ng_10d                      |                                    |                            |
|                                       | "A. awamori"                            | NBRC 8876                           | 10day_#1               | 81                                | <i>A. niger</i>                       |                                            | ng_all, ng_10d                     |                            |
|                                       |                                         |                                     | 10day_#2               | 110                               | <i>A. niger</i>                       | ng_5d, ng_all, ng_10d                      |                                    | ng5                        |
|                                       |                                         |                                     | 5day_#1                | 121                               | <i>A. niger</i>                       | ng14, ng11, ng10, ng13, ng8                | ng5, ng7, ng12, ng_all, ng_5d, ng9 |                            |
|                                       | "A. awamori"                            | NBRC 4115                           | 5day_#2                | 114                               | <i>A. niger</i>                       | ng14, ng13, ng11                           | ng10, ng12, ng8, ng7, ng_5d        | ng9                        |
|                                       |                                         |                                     | 10day_#1               | 185                               | <i>A. niger</i>                       | ng_all, ng_10d                             | ng_5d                              |                            |
|                                       |                                         |                                     | 10day_#2               | 160                               | <i>A. niger</i>                       | ng_5d, ng_10d, ng_all                      | ng5                                |                            |
|                                       | "A. awamori"                            | NBRC 4119                           | 5day_#1                | 105                               | <i>A. niger</i>                       | ng_5d, ng_10d, ng_all                      |                                    |                            |
|                                       |                                         |                                     | 10day_#1               | 89                                | <i>A. niger</i>                       | ng_5d                                      | ng_all                             | ng7                        |
|                                       | <i>A. foetidus</i>                      | NBRC 4312                           | 10day_#1               | 108                               | <i>A. niger</i>                       | ng_5d, ng_10d, ng_all, ng5                 |                                    |                            |
|                                       |                                         |                                     | 10day_#1               | 106                               | <i>A. niger</i>                       |                                            | ng14                               | ng11                       |
|                                       | <i>A. phoenicis</i>                     | NBRC 8874                           | 10day_#1               | 88                                | N.I.                                  |                                            |                                    |                            |
| 5day_#1                               |                                         |                                     | 96                     | <i>A. niger</i>                   |                                       | ng8                                        | ng_all, ng_5d                      |                            |
| <i>A. niger</i> f. <i>hennebergii</i> | NBRC 4043                               | 10day_#1                            | 96                     | <i>A. niger</i>                   |                                       |                                            | ng_5d, ng_10d, ng_all              |                            |
|                                       |                                         | 5day_#1                             | 106                    | <i>A. niger</i>                   | ng14, ng11                            | ng13, ng10, ng12                           |                                    |                            |
|                                       |                                         | 5day_#2                             | 115                    | <i>A. niger</i>                   | ng14, ng11, ng13, ng10                | ng9, ng12                                  | ng8                                |                            |
|                                       |                                         | 10day_#1                            | 102                    | <i>A. niger</i>                   | ng14, ng11, ng13                      | ng12, ng10, ng9                            | ng8                                |                            |
|                                       |                                         | 10day_#2                            | 91                     | <i>A. niger</i>                   | ng14                                  | ng11, ng8, ng10, ng13                      | ng12                               |                            |
|                                       |                                         | II                                  | <i>A. brasiliensis</i> | NBRC 105650                       | 5day_#1                               | 102                                        | <i>A. brasiliensis</i>             | br_5d, br_all, br_10d, br5 |
| 5day_#2                               | 108                                     |                                     |                        |                                   | <i>A. brasiliensis</i>                | br_5d, br_all, br5                         | br_10d, br1                        | br2, br3                   |
| 10day_#1                              | 111                                     |                                     |                        |                                   | <i>A. brasiliensis</i>                | br_all, br_5d, br_10d                      |                                    |                            |
| 10day_#2                              | 133                                     |                                     |                        |                                   | <i>A. brasiliensis</i>                | br_all, br_5d, br_10d, br5                 | br8, br1, br3, br2                 |                            |
| <i>A. brasiliensis</i>                | NBRC 6341                               |                                     | 5day_#1                | 116                               | <i>A. brasiliensis</i>                | br_all, br_5d, br_10d, br5                 | br1, br2, br3                      |                            |
|                                       |                                         |                                     | 5day_#2                | 100                               | <i>A. brasiliensis</i>                | br_all, br_5d, br_10d                      |                                    | br5                        |
| <i>A. brasiliensis</i>                | NBRC 9455                               |                                     | 10day_#1               | 128                               | <i>A. brasiliensis</i>                | br_all, br_5d, br_10d                      |                                    |                            |
|                                       |                                         |                                     | 10day_#2               | 121                               | <i>A. brasiliensis</i>                | br_all, br_5d, br_10d                      |                                    |                            |
|                                       |                                         |                                     | 5day_#1                | 123                               | <i>A. brasiliensis</i>                | 9455_all, 9455_5d, 9455_10d, br5, br1, br4 |                                    | br_5d, br_all              |
|                                       |                                         |                                     | 5day_#2                | 99                                | <i>A. brasiliensis</i>                | 9455_5d, 9455_10d, 9455_all                |                                    | br8                        |
|                                       |                                         | 10day_#1                            | 136                    | <i>A. brasiliensis</i>            | 9455_5d, 9455_10d, 9455_all           | br8                                        |                                    |                            |
|                                       |                                         | 10day_#2                            | 131                    | <i>A. brasiliensis</i>            | 9455_5d, 9455_10d, 9455_all           | br8                                        | br5                                |                            |
| III                                   | <i>A. luchuensis</i>                    | NBRC 4281 <sup>T</sup>              | 5day_#1                | 95                                | <i>A. luchuensis/kawachii</i>         | lk_10d                                     | lk_all, lk_5d                      |                            |
|                                       |                                         |                                     | 5day_#2                | 87                                | <i>A. luchuensis/kawachii</i>         | lk_all, lk_5d                              | lk_10d                             |                            |
|                                       | <i>A. luchuensis</i>                    | NBRC 111188                         | 10day_#1               | 105                               | <i>A. luchuensis/kawachii</i>         | lk_10d, lk_all                             |                                    | lk_5d                      |
|                                       |                                         |                                     | 10day_#2               | 117                               | <i>A. luchuensis/kawachii</i>         | lk_10d, lk_all                             |                                    | lk_5d                      |
|                                       | <i>A. kawachii</i>                      | NBRC 4308                           | 5day_#1                | 118                               | <i>A. luchuensis/kawachii</i>         | lk_all, lk_5d                              | lk_5d, ng14, lk_10d                | ng10                       |
|                                       |                                         |                                     | 5day_#2                | 117                               | <i>A. luchuensis/kawachii</i>         | lk_all, lk_5d, lk10d                       |                                    |                            |
|                                       | <i>A. luchuensis</i>                    | NBRC 4314                           | 10day_#1               | 132                               | <i>A. luchuensis/kawachii</i>         | lk_5d, lk_10d, lk_all                      |                                    |                            |
|                                       |                                         |                                     | 10day_#2               | 147                               | <i>A. luchuensis/kawachii</i>         | lk_5d, lk_10d, lk_all                      |                                    |                            |
|                                       | <i>A. luchuensis</i>                    | NBRC 6086                           | 5day_#1                | 133                               | <i>A. luchuensis/kawachii</i>         | lk_5d, lk_10d, lk_all                      |                                    |                            |
|                                       |                                         |                                     | 5day_#2                | 119                               | <i>A. luchuensis/kawachii</i>         | lk_5d, lk_10d, lk_all                      |                                    |                            |
|                                       | <i>A. luchuensis</i>                    | NBRC 4033                           | 10day_#1               | 146                               | <i>A. luchuensis/kawachii</i>         | lk_5d, lk_10d, lk_all                      |                                    |                            |
|                                       |                                         |                                     | 10day_#2               | 109                               | <i>A. luchuensis/kawachii</i>         | lk_10d                                     | lk_5d, lk_all                      |                            |
|                                       | <i>A. foetidus</i> var. <i>pallidus</i> | NBRC 4118                           | 5day_#1                | 94                                | <i>A. luchuensis/kawachii</i>         |                                            | lk_10d, lk_all                     |                            |
|                                       |                                         |                                     | 5day_#2                | 99                                | <i>A. luchuensis/kawachii</i>         | lk_10d, lk_all                             | lk_5d                              |                            |
|                                       | <i>A. foetidus</i> var. <i>acidus</i>   | NBRC 4121                           | 10day_#1               | 123                               | <i>A. luchuensis/kawachii</i>         | lk_10d                                     | lk_all                             |                            |
|                                       |                                         |                                     | 10day_#2               | 111                               | <i>A. luchuensis/kawachii</i>         | lk_10d, lk_all                             | lk_5d                              |                            |
|                                       | <i>A. foetidus</i> var. <i>pallidus</i> | NBRC 4123                           | 5day_#1                | 122                               | <i>A. luchuensis/kawachii</i>         | lk_5d, lk_10d, lk_all                      |                                    |                            |
|                                       |                                         |                                     | 5day_#2                | 127                               | <i>A. luchuensis/kawachii</i>         | lk_5d, lk_10d, lk_all                      |                                    |                            |
|                                       | <i>A. foetidus</i>                      | NBRC 4338                           | 10day_#1               | 152                               | <i>A. luchuensis/kawachii</i>         | lk_5d, lk_10d, lk_all                      |                                    |                            |
|                                       |                                         |                                     | 10day_#2               | 128                               | <i>A. luchuensis/kawachii</i>         | lk_5d, lk_10d, lk_all                      |                                    |                            |
|                                       |                                         | 10day_#1                            | 108                    | <i>A. luchuensis/kawachii</i>     |                                       |                                            | lk_10d                             |                            |
|                                       |                                         | 10day_#2                            | 92                     | <i>A. luchuensis/kawachii</i>     | lk_all, lk_10d                        | lk_5d                                      |                                    |                            |
|                                       |                                         | 10day_#1                            | 103                    | <i>A. luchuensis/kawachii</i>     |                                       | lk_10d                                     | lk_all                             |                            |
|                                       |                                         | 10day_#2                            | 107                    | N.I.                              |                                       |                                            |                                    |                            |
|                                       |                                         | 10day_#1                            | 138                    | <i>A. luchuensis/kawachii</i>     |                                       | lk_10d, lk_all                             |                                    |                            |
|                                       |                                         | 10day_#2                            | 73                     | N.I.                              |                                       |                                            |                                    |                            |
|                                       |                                         | 10day_#1                            | 126                    | <i>A. luchuensis/kawachii</i>     |                                       | lk_10d, lk_all                             |                                    |                            |
|                                       |                                         | 10day_#2                            | 76                     | N.I.                              |                                       |                                            |                                    |                            |
|                                       |                                         | 10day_#1                            | 71                     | N.I.                              |                                       |                                            |                                    |                            |
|                                       |                                         | 10day_#2                            | 79                     | N.I.                              |                                       |                                            |                                    |                            |
| IV-1                                  | <i>A. neoniger</i>                      | NBRC 113385 <sup>T</sup>            | 5day_#1                | 167                               | <i>A. neoniger</i>                    | 113385_all, 113385_5d, 113385_10d          |                                    | ng14, ng9, ng10            |
|                                       |                                         |                                     | 5day_#2                | 157                               | <i>A. neoniger</i>                    | 113385_all, 113385_5d, 113385_10d          |                                    | ng10                       |
|                                       | <i>A. phoenicis</i>                     | NBRC 8872<br>( <i>A. neoniger</i> ) | 10day_#1               | 137                               | <i>A. neoniger</i>                    | 113385_10d, 113385_all                     |                                    |                            |
|                                       |                                         |                                     | 10day_#2               | 181                               | <i>A. neoniger</i>                    | 113385_all, 113385_5d, 113385_10d          | ng13, neo/tub_5d                   | ng14                       |
|                                       | <i>A. phoenicis</i>                     | NBRC 8873<br>( <i>A. neoniger</i> ) | 5day_#1                | 171                               | <i>A. neoniger</i>                    | neo_all, neo_5d, neo_10d                   | neo/tub_5d                         |                            |
|                                       |                                         |                                     | 5day_#2                | 119                               | <i>A. neoniger</i>                    | neo_all, neo_5d                            |                                    |                            |
|                                       | <i>A. awamori</i>                       | NBRC 4068<br>( <i>A. neoniger</i> ) | 10day_#1               | 122                               | <i>A. neoniger</i>                    | neo_10d, neo_all                           | neo_5d                             |                            |
|                                       |                                         |                                     | 10day_#2               | 84                                | <i>A. neoniger</i>                    |                                            |                                    | neo_10d                    |
|                                       | <i>A. tubingensis</i>                   | NBRC 113384 <sup>T</sup>            | 10day_#3               | 109                               | <i>A. neoniger</i>                    | neo_all, neo_10d                           | neo_5d                             |                            |
|                                       |                                         |                                     | 5day_#1                | 172                               | <i>A. neoniger</i>                    | neo_5d, neo_all, neo_10d                   |                                    |                            |
| <i>A. tubingensis</i>                 | NBRC 4407<br>( <i>A. tubingensis</i> )  | 5day_#2                             | 98                     | <i>A. neoniger</i>                | neo_5d, neo_all                       | neo_10d                                    |                                    |                            |
|                                       |                                         | 10day_#1                            | 223                    | <i>A. neoniger</i>                | neo_10d, neo_all                      |                                            | neo_5d                             |                            |
| <i>A. tubingensis</i>                 | NBRC 4407<br>( <i>A. tubingensis</i> )  | 10day_#2                            | 133                    | <i>A. neoniger</i>                | neo_all, neo_10d, neo_5d              |                                            |                                    |                            |
|                                       |                                         | 5day_#1                             | 176                    | <i>A. neoniger/A. tubingensis</i> | neo/tub_all, neo_5d, neo_all, neo/tub | tub_10d, tub_5d                            | 113384_all                         |                            |
| <i>A. tubingensis</i>                 | NBRC 4407<br>( <i>A. tubingensis</i> )  | 5day_#2                             | 123                    | <i>A. neoniger/A. tubingensis</i> | neo/tub_all, neo_all, neo_5d          | tub_10d, tub_all, neo/tub_5d, neo_10d      |                                    |                            |
|                                       |                                         | 10day_#1                            | 149                    | <i>A. neoniger/A. tubingensis</i> | neo/tub_all, neo_all, neo_10d, neo_5d | tub_all, tub_5d, ng9                       |                                    |                            |
| <i>A. niger</i>                       | NBRC 4407<br>( <i>A. tubingensis</i> )  | 5day_#1                             | 134                    | <i>A. tubingensis</i>             | 113384_5d, 113384_all                 | 113384_10d, tub_5d                         | tub_all, neo/tub_all, neo/tub_5d   |                            |
|                                       |                                         | 5day_#2                             | 140                    | <i>A. tubingensis</i>             | 113384_5d, 113384_all, 113384_10d     | tub_5d                                     | tub_all, neo/tub_all, neo/tub_5d   |                            |
|                                       |                                         | 10day_#1                            | 118                    | <i>A. tubingensis</i>             | 113384_10d, 113384_all                | 113384_5d,                                 | ng10                               |                            |
|                                       |                                         | 10day_#2                            | 137                    | <i>A. tubingensis</i>             | 113384_10d, 113384_all                | neo/tub_5d, 113384_5d, tub_5d              | neo/tub_all                        |                            |
|                                       |                                         | 5day_#1                             | 101                    | <i>A. tubingensis</i>             | tub_5d, tub_all                       | neo/tub_5d, neo/tub_all, tub_10d           |                                    |                            |
|                                       |                                         | 5day_#2                             | 144                    | <i>A. tubingensis</i>             | tub_5d, neo/tub_all, neo/tub_5d, tub  | ng10, ng9                                  | ng14, lk_all, 113384_all           |                            |
| <i>A. niger</i>                       | NBRC 4407<br>( <i>A. tubingensis</i> )  | 10day_#1                            | 109                    | <i>A. tubingensis</i>             |                                       | tub_5d, ng10, tub_all, tub_10d, neo/tu     | ng9                                |                            |
|                                       |                                         | 10day_#2                            | 114                    | <i>A. tubingensis</i>             | tub_all, tub_10d                      | neo/tub_all, tub_5d, neo/tub_5d            |                                    |                            |

|                     |                                        |                                         |          |                                  |                                  |                                                             |                             |                 |
|---------------------|----------------------------------------|-----------------------------------------|----------|----------------------------------|----------------------------------|-------------------------------------------------------------|-----------------------------|-----------------|
| IV-2                | <i>A. niger</i>                        | NBRC 31125<br>( <i>A. tubingensis</i> ) | 5day_#1  | 189                              | <i>A. tubingensis</i>            | tub_5d, neo/tub_all, neo/tub_5d                             | tub_10d, tub_all            |                 |
|                     |                                        |                                         | 5day_#2  | 127                              | <i>A. tubingensis</i>            | tub_5d, neo/tub_all, neo/tub_5d, tub_all, tub_10d           |                             |                 |
|                     |                                        |                                         | 10day_#1 | 146                              | N.I.                             |                                                             |                             |                 |
|                     |                                        |                                         | 10day_#2 | 174                              | N.I.                             |                                                             |                             |                 |
|                     | <i>A. ficuum</i>                       | NBRC 4050                               | 5day_#1  | 119                              | <i>A. neoniger/A.tubingensis</i> | neo/tub_5d, neo/tub_all, tub_5d, tub_113384_all, 113384_10d |                             | ng10            |
|                     |                                        |                                         | 5day_#2  | 94                               | <i>A. tubingensis</i>            | tub_5d, neo/tub_all, neo/tub_5d, tub_tub_10d                |                             |                 |
|                     |                                        |                                         | 10day_#1 | 116                              | <i>A. neoniger/A.tubingensis</i> |                                                             | neo/tub_all, neo/tub_5d     | tub_5d, tub_10d |
|                     |                                        |                                         | 10day_#2 | 134                              | <i>A. tubingensis</i>            | tub_5d, neo/tub_all, neo/tub_5d, tub_tub_10d                |                             |                 |
|                     | <i>A. ficuum</i>                       | NBRC 4280<br>( <i>A. tubingensis</i> )  | 5day_#1  | 122                              | <i>A. tubingensis</i>            | tub_5d, neo/tub_all, neo/tub_5d, tub_all                    |                             | tub_10d         |
|                     |                                        |                                         | 5day_#2  | 103                              | <i>A. neoniger/A.tubingensis</i> | neo/tub_all, tub_5d, neo/tub_5d, tub_all                    |                             | tub_10d         |
|                     |                                        |                                         | 10day_#1 | 170                              | <i>A. tubingensis</i>            | tub_10d, neo/tub_all                                        |                             |                 |
|                     |                                        |                                         | 10day_#2 | 106                              | N.I.                             |                                                             |                             |                 |
| <i>A. phoenicis</i> | NBRC 7523<br>( <i>A. tubingensis</i> ) | 5day_#1                                 | 107      | <i>A. tubingensis</i>            | tub_all                          | tub_10d, neo/tub_all, tub_5d                                | neo/tub_5d                  |                 |
|                     |                                        | 5day_#2                                 | 97       | <i>A. neoniger/A.tubingensis</i> |                                  | neo/tub_all, tub_all                                        | tub_10d, neo/tub_5d, tub_5d |                 |
|                     |                                        | 10day_#1                                | 179      | <i>A. tubingensis</i>            | tub_10d, neo/tub_all, tub_all    | ng10, neo/tub_5d, 113384_all, tub_5d                        | ng14, br                    |                 |
|                     |                                        | 10day_#2                                | 121      | N.I.                             |                                  |                                                             |                             |                 |
| V                   | <i>A. carbonarius</i>                  | NBRC 4038                               | 5day_#1  | 90                               | <i>A. carbonarius</i>            | ca5d                                                        |                             |                 |
|                     |                                        |                                         | 5day_#2  | 118                              | <i>A. carbonarius</i>            | ca5d                                                        | ca_all                      |                 |
|                     |                                        |                                         | 10day_#1 | 107                              | <i>A. carbonarius</i>            | ca_10d, ca_all                                              |                             |                 |
|                     |                                        |                                         | 10day_#2 | 125                              | <i>A. carbonarius</i>            | ca_10d, ca_all                                              | ca_5d                       |                 |
|                     | <i>A. carbonarius</i>                  | NBRC 4039                               | 5day_#1  | 103                              | <i>A. carbonarius</i>            | ca_5d                                                       | ca_all                      |                 |
|                     |                                        |                                         | 5day_#2  | 156                              | <i>A. carbonarius</i>            | ca_5d, ca_10d, ca_all                                       |                             |                 |
|                     |                                        |                                         | 10day_#1 | 105                              | <i>A. carbonarius</i>            | ca_10d, ca_all                                              |                             | ca_5d           |
|                     |                                        |                                         | 10day_#2 | 116                              | <i>A. carbonarius</i>            | ca_5d, ca_10d, ca_all                                       |                             |                 |
|                     | <i>A. carbonarius</i>                  | NBRC 5864                               | 5day_#1  | 128                              | <i>A. carbonarius</i>            | ca_5d, ca_10d, ca_all                                       |                             |                 |
|                     |                                        |                                         | 5day_#2  | 129                              | <i>A. carbonarius</i>            | ca_5d, ca_10d, ca_all                                       |                             |                 |
|                     |                                        |                                         | 10day_#1 | 118                              | <i>A. carbonarius</i>            | ca_5d, ca_10d, ca_all                                       |                             |                 |
|                     |                                        |                                         | 10day_#2 | 80                               | <i>A. carbonarius</i>            | ca_10d, ca_all                                              |                             |                 |
| VI                  | <i>A. japonicus</i>                    | NBRC 4060                               | 5day_#1  | 108                              | <i>A. japonicus</i>              | jp_5d, jp_all                                               | jp_10d                      |                 |
|                     |                                        |                                         | 5day_#2  | 120                              | <i>A. japonicus</i>              | jp_5d, jp_10d, jp_all                                       |                             |                 |
|                     |                                        |                                         | 10day_#1 | 102                              | <i>A. japonicus</i>              | jp_5d, jp_10d, jp_all                                       |                             |                 |
|                     | <i>A. japonicus</i>                    | NBRC 4337                               | 10day_#2 | 89                               | <i>A. japonicus</i>              | jp_5d, jp_10d, jp_all                                       |                             |                 |
|                     |                                        |                                         | 5day_#1  | 130                              | <i>A. japonicus</i>              | jp_5d, jp_all                                               |                             |                 |
|                     |                                        |                                         | 5day_#2  | 106                              | <i>A. japonicus</i>              | jp_5d, jp_all                                               |                             | jp_10d          |
|                     | <i>A. japonicus</i>                    | NBRC 4408                               | 10day_#1 | 147                              | <i>A. japonicus</i>              | jp_5d, jp_10d, jp_all                                       | 32856_10d, 32856_5d         |                 |
|                     |                                        |                                         | 10day_#2 | 86                               | <i>A. japonicus</i>              | jp_5d, jp_10d, jp_all                                       |                             |                 |
|                     |                                        |                                         | 5day_#1  | 73                               | <i>A. japonicus</i>              | jp_10d                                                      | jp_all, 32856_5d, 32856_all | jp_5d           |
|                     | <i>A. japonicus</i>                    | NBRC 32856                              | 5day_#2  | 111                              | <i>A. japonicus</i>              | jp_5d, jp_10d, jp_all                                       |                             |                 |
|                     |                                        |                                         | 10day_#1 | 72                               | <i>A. japonicus</i>              | jp_10d, jp_all                                              | jp_5d                       |                 |
|                     |                                        |                                         | 10day_#2 | 111                              | <i>A. japonicus</i>              | jp_5d, jp_10d, jp_all                                       | 32856_10d, 32856_all        | 32856_5d        |
|                     | <i>A. japonicus</i>                    | NBRC 5330                               | 5day_#1  | 75                               | <i>A. japonicus</i>              | 32856_5d, 32856_10d, 32856_all                              |                             | jp_10d          |
|                     |                                        |                                         | 5day_#2  | 75                               | <i>A. japonicus</i>              | 32856_5d, 32856_10d, 32856_all                              |                             |                 |
|                     |                                        |                                         | 10day_#1 | 79                               | <i>A. japonicus</i>              | 32856_5d, 32856_10d, 32856_all                              | jp_10d                      |                 |
|                     | <i>A. aculeatus</i>                    | NBRC 5330                               | 10day_#2 | 87                               | <i>A. japonicus</i>              | 32856_5d, 32856_10d, 32856_all                              |                             |                 |
|                     |                                        |                                         | 5day_#1  | 98                               | <i>A. japonicus</i>              | jp_all                                                      | jp_5d, jp_10d               |                 |
|                     |                                        |                                         | 10day_#2 | 78                               | <i>A. japonicus</i>              |                                                             |                             | jp_10d, jp_all  |
| "A. carbonarius"    | NBRC 4030                              | 5day_#1                                 | 106      | <i>A. japonicus</i>              | jp_5d, jp_all                    | jp_10d                                                      |                             |                 |
|                     |                                        | 5day_#2                                 | 85       | <i>A. japonicus</i>              | jp_all, jp_5d                    | jp_10d                                                      |                             |                 |
|                     |                                        | 10day_#1                                | 103      | <i>A. japonicus</i>              | jp_10d                           |                                                             | jp_all, jp_5d               |                 |
|                     |                                        | 10day_#2                                | 112      | <i>A. japonicus</i>              | jp_5d, jp_all                    |                                                             | jp_10d                      |                 |
| VII                 | <i>A. aculeatus</i>                    | NBRC 31348                              | 10day_#1 | 87                               | N.I.                             |                                                             |                             |                 |
|                     |                                        |                                         | 10day_#2 | 102                              | N.I.                             |                                                             |                             |                 |

N.I.: Not identified any.
